1 **Over 2000-fold increased production of the leaderless bacteriocin garvicin KS by genetic**  
2 **engineering and optimization of culture conditions**

3

4 Amar A. Telke, Kirill V. Ovchinnikov, Kiira S. Vuoristo, Geir Mathiesen, Tage Thorstensen,  
5 Dzung B. Diep<sup>#</sup>.

6

7 Faculty of Chemistry, Biotechnology and Food Science, Norwegian University of Life  
8 Sciences, Ås, Norway

9

10 **Running Head: Optimization of bacteriocin production**

11

12

13 **#Address correspondence to Dzung B. Diep, [dzung.diep@nmbu.no](mailto:dzung.diep@nmbu.no)**

14 **\*Present address:**

15 Faculty of Chemistry, Biotechnology, and Food Science.

16 Norwegian University of Life Sciences

17 PB 5003 Chr. M. Falsensvei 1.

18 N-1432 Aas

19 Norway

20 **Abstract**

21 The leaderless bacteriocin Garvicin KS (GarKS) is a potent antimicrobial, being active against a  
22 wide range of important pathogens. GarKS production by the native producer *Lactococcus*  
23 *garvieae* KS1546 was however relatively low (80 BU/ml) under standard laboratory growth  
24 conditions (batch culture in GM17 at 30°C). To improve the production of GarKS, we  
25 systematically evaluated the impact of different media and media components on bacteriocin  
26 production. Based on the outcomes a new medium formulation was made to greatly improve  
27 bacteriocin production. The new medium composed of pasteurized milk and tryptone (PM-T),  
28 increased GarKS production about 60-fold compared to that achieved in GM17. GarKS production  
29 was increased further 4-fold (i.e., to 20,000 BU/ml) by increasing gene dose of the bacteriocin  
30 gene cluster (*gak*) in the native producer. Finally, a combination of the newly composed medium  
31 (PM-T), an increased gene dose and a cultivation at a constant pH 6 and a 50-60% dissolved  
32 oxygen level in growth medium, gave rise to a GarKS production of 164,000 BU/ml. This high  
33 production, which is about 2000-fold higher compared to that initially achieved in GM17,  
34 corresponds to a GarKS production of 1.2 g/L. To our knowledge, this is one of the highest  
35 bacteriocin production reported hitherto.

36 **Importance:** Low bacteriocin production is a well-known bottle-neck in developing bacteriocins  
37 into large-scaled and useful applications. The present study shows different approaches that  
38 significantly improve bacteriocin production. This is an important research field to better exploit  
39 the antimicrobial potential of bacteriocins, especially with regard to the decreasing effect of  
40 antibiotics in infection treatments due to the global emergence of antibiotic resistance.

## 42 **Introduction**

43 The decreasing effectiveness of antibiotics has become a serious worldwide problem due to the  
44 emergence of multidrug-resistant bacteria (1, 2). Despite that, the number of new commercially  
45 available antibiotics is dwindling. This is partly due to the fact that developing new antibiotics is  
46 a very costly process (3), and the biopharma companies are therefore often reluctant to invest large  
47 money in new antibiotics that soon may be useless because of resistance development.  
48 Consequently, there is an urgent need of cost-effective and efficient antimicrobial agents with  
49 different killing mechanisms to overcome multidrug-resistant bacteria.

50 Bacteriocins are ribosomally synthesized antibacterial peptides produced by bacteria, probably as  
51 a means to compete for nutrients and habitats (4). So far hundreds of bacteriocins have been  
52 isolated and characterized. Most of them have narrow-spectrum activity but some are active  
53 against a broad-spectrum of bacteria including food-spoiling bacteria as well as important  
54 pathogens (5, 6). Bacteriocins produced by lactic acid bacteria (LAB) are particularly interesting  
55 due to LAB's safe status as they are commonly found in our foods (7, 8) and the gastrointestinal  
56 tract of man (9) and animals (10). Most bacteriocins are membrane-active peptides, killing  
57 sensitive bacteria by membrane disruption after selective interaction with specific membrane  
58 receptors (11-15). This mode of action is different from most antibiotics which often act as  
59 enzyme-inhibitors (16, 17). For this reason, antibiotic-resistant pathogens are often sensitive to  
60 bacteriocins, thus making the latter very attractive as alternative or complementary drugs for  
61 therapeutic use, especially to fight antibiotic resistance. Nevertheless, poor production is often a  
62 bottleneck in large-scaled production of bacteriocins. Previous studies have shown that bacteriocin  
63 production can be increased by optimization of growth conditions such as cultivation temperature,

64 pH, aeration and growth medium (18-25). In addition, various heterologous expression systems  
65 have been reported for increased bacteriocin production (26-30).

66 Recently we have reported the identification and characterization of a novel three-peptide  
67 bacteriocin called garvicin KS (GarKS), produced by *L. garvieae* KS1546, a strain isolated from  
68 raw bovine milk in Kosovo (31). A gene cluster (*gak*) containing the three structural genes  
69 (*gakABC*) and genes likely involved in immunity (*gakIR*) and transport (*gakT*) has been identified  
70 in the genome (31). GarKS is active against a broad spectrum of bacteria such as *Listeria*,  
71 *Staphylococcus*, *Bacillus*, *Streptococcus* and *Enterococcus* (31). Despite its great potential,  
72 production of GarKS is relatively moderate in standard laboratory growth conditions. To overcome  
73 this problem, we conducted a multi-factorial optimization study that resulted in over 2000-fold  
74 increased bacteriocin production. This approach includes medium optimization, genetic  
75 engineering and cultivation optimization,

76

77

78

## 79 **Results**

### 80 **GarKS production in complex media**

81 *L. garvieae* KS1546 (hereafter referred to KS1546) was routinely grown in the complex medium  
82 GM17 at 30°C without agitation, and GarKS production was typically of 80 BU/mL after 7-12 h  
83 growth. The bacteriocin production by KS1546 was examined in different complex media (MRS,  
84 BHI and TH). Highest production was found between 7-12 h of growth in all tested media except  
85 for TH where bacteriocin production appeared constantly low for all time-points tested (Fig. 1A).  
86 Relative to GM17, GarKS production increased 2 to 4-fold in MRS, while it was about 2 to 4-fold  
87 less in BHI and TH (Fig. 1A). Cell growth was the best in GM17 ( $3 \times 10^9$  CFU/ml) but the poorest  
88 in MRS ( $1 \times 10^9$  CFU/ml) after 24 h at 30°C (Table 1).

89

### 90 **GarKS production increased in milk-based media**

91 It is well known that bacteria are ecologically adapted to the environments where they normally  
92 thrive. Since the producer KS1546 was isolated from raw milk (31), we examine the possibility to  
93 use skim milk (SM) as growth medium. Bacteriocin production was increased 2-fold in SM (160  
94 BU/ml) compared to GM17 (Fig. 1B). However, cell growth was remarkably poor in skim milk  
95 ( $2 \times 10^8$  CFUs/ml) (Table 1), indicating that some growth factors were present in complex media  
96 but absent in SM. Therefore, we tested the mixtures (50:50; v/v) of skim milk and complex media  
97 (GM17, MRS, BHI and TH). As a result, the bacteriocin production was increased 16 times in  
98 skim milk combined with TH (SM-TH) and 8 times in SM-GM17, compared to the production in  
99 skim milk (Table 1 and Fig. 1B). The bacteriocin production in SM-TH and SM-GM17 was 2600  
100 BU/ml and 1280 BU/ml after 9 h of incubation, respectively. On the other hand, no significant  
101 increase of GarKS in SM-MRS (320 BU/ml) and SM-BHI (160 BU/ml) was found in all time

102 points (Fig. 1B). All medium formulations gave approximately a similar cell density, i.e., between  
103  $2.8 \times 10^9$ - $3 \times 10^9$  CFUs/ml (Table 1).

104 The results above indicate that bacteriocin production was significantly influenced by some  
105 specific factor(s)/nutrient(s), which are present in TH and GM17, but absent in MRS and BHI.  
106 Tryptone, a tryptic digest of milk protein casein (32), is one of the nutrients found in GM17 and  
107 TH, but not in MRS and BHI. The final concentration of tryptone in GM17 and TH broth is 0.5%  
108 and 2%, respectively. To examine whether tryptone could improve cell growth and bacteriocin  
109 production in combination with SM, we made formulations with different v/v ratios of SM and  
110 10% tryptone (w/v). Highest bacteriocin production (about 2,600 BU/ml) was achieved when they  
111 were mixed in equal volumes (50% ; v/v); this mixture had a final concentration of tryptone of 5%  
112 (w/v) (Figure 2). Under these circumstances, final cell density was comparable to that in GM17,  
113 i.e., about  $3 \times 10^9$  CFU/ml (Table 1). The formulation composed of SM (50 %; v/v) and a final 5%  
114 of tryptone (w/v) is hereafter called SM-T.

115 Yeast extract is a rich source of vitamins, minerals, and amino acids, which often improves  
116 bacterial growth. We examined the effect of yeast extract (YE) in combination with SM-T. The  
117 resulting formulation, SM-T-YE (SM-T containing 1% (w/v) yeast extract) yielded the same cell  
118 density as in SM-T ( $3 \times 10^9$  CFU/ml), but bacteriocin production was reduced by 50% (Table 1).  
119 Yeast extract was therefore excluded from the growth medium.

120 Although SM-T appeared as a good medium for the producer, we constantly encountered the  
121 problem associated with caramelization of milk sugars in skim milk during autoclaving, which  
122 might have detrimental effects on milk nutrition value. To avoid this problem, the autoclaved skim  
123 milk in SM-T was replaced with equal amount of pasteurized milk, resulting in a new medium  
124 termed pasteurized milk–tryptone (PM-T). The contents in milk (Q-milk) according to the

125 manufacturer (Q-Meieriene AS, Bergen, Norway) are, g/l: fat, 5; carbohydrate, 45; protein, 35;  
126 salt, 1; calcium, 1.3; vitamin B<sub>2</sub>, 0.001; and vitamin B<sub>12</sub>,  $0.7 \times 10^{-5}$ . Indeed, cell growth in PM-T  
127 was increased to  $3.5 \times 10^9$  CFU/ml and GarKS production increased two-fold in comparison to that  
128 in SM-T (Table 2).

129

### 130 **GarKS production increased by genetic engineering**

131 The three structural genes (*gakABC*) encoding the three peptides that constitute GarKS are  
132 clustered with genes probably involved in immunity (*gakIR*) and transport (*gakT*). First we  
133 explored the possibility to increase bacteriocin production by increasing only the gene dose of  
134 structural genes *gakABC* in the native producer. The recombinant plasmid pABC carrying  
135 structural genes *gakABC* was constructed to deliver high gene dose in the native producer (Fig.  
136 3A). However, we failed to get any transformants even after several attempts. Similar negative  
137 result (i.e., no transformants) was obtained when we attempted to transfer pABC into the  
138 heterologous host *L. lactis* IL1403 (data not shown). Probably, increased gene dose of the  
139 structural genes might override the immunity or/and the transporter in the native producer, leading  
140 to toxicity to cells. Consequently, the plasmid pA2T carrying the entire *gak* locus including the  
141 genes involved in immunity and transport was constructed pA2T (Fig. 3B). The plasmid was first  
142 transferred into *L. lactis* IL1403. As expected, transformation was successful and bacteriocin  
143 production was detected in transformed cells (data not shown), confirming the functionality of the  
144 *gak* locus. Next the plasmid was transferred into the native KS1546 and the clone (KS1546-pA2T)  
145 was assessed for bacteriocin production. Using PM-T as growth medium, GarKS production by  
146 the recombinant producer KS1546-pA2T was found to increase to 20,000 BU/mL, which is about

147 4 times more than the production without increased gene dose (native KS1546 in PM-T), and about  
148 250-fold more than that initially obtained in GM17 (native KS1546 in GM17) (Table 1).  
149 To compare the growth patterns, the native and recombinant producers were grown under similar  
150 growth conditions. The recombinant producer KS1546-pA2T showed a prolonged lag growth  
151 phase compared to the native GarKS producer (with or without empty plasmid). Nevertheless,  
152 KS1546-pA2T reached eventually about the same high cell density as the wild type control cells  
153 when it entered stationary growth phase (see Fig.4).

154

### 155 **Optimization of culture conditions in a bioreactor increased GarKS production**

156 The initial pH at 7 was declined to 4.8 when the recombinant producer KS1546-pA2T was grown  
157 in PM-T for 6-7 h at 30°C (data not shown). To examine whether pH reduction could have a  
158 negative impact on bacteriocin production, we grew the recombinant producer (KS1546-pA2T) in  
159 PM-T in a bioreactor with constant pH at 5, 6 or 7. Indeed, pH had a great impact on cell growth  
160 and bacteriocin production. Highest cell growth ( $0.7 \times 10^{10}$  CFU/ml) and bacteriocin production  
161 (82,000 BU/ml) were found at constant pH 6 (Table 1). Bacteriocin production measured at all  
162 time-points was also highest at constant pH 6 (Fig. 5). Cell growth and bacteriocin production  
163 were lowest at constant pH 5.

164 Aeration is defined as dissolved oxygen (DO) percentage in a culture medium. We observed that  
165 the initial DO level at 50-60% was declined to 10% after 2 hours of cell growth in PM-T medium  
166 and at constant pH 6. The effect of aeration on GarKS production was therefore examined by  
167 purging the atmospheric sterile air into the growth medium (constant pH at 6). With aeration kept  
168 at 50-60%, highest cell growth ( $1 \times 10^{10}$  CFU/ml) and bacteriocin production (164,000 BU/ml)



169 were obtained (Table 1 and Fig. 5). This level of bacteriocin production (164,000 BU/ml) was  
170 about 2000-fold more than the initial production in GM17 which was 80 BU/ml.

171 We have previously shown that synthetic GarKS is functionally comparable to the biologically  
172 produced counterpart (31). Synthetic GarKS (with > 90% purity) has a specific activity of 130-  
173 140 BU/ $\mu$ g. Hence, the production of 164,000 BU/ml is equivalent to 1.2 g GarKS per liter which  
174 is a level of commercial importance.

175

176 **Discussion**

177 GarKS is potent against a set of important pathogens including *Staphylococcus*, *Bacillus*, *Listeria*,  
178 *Streptococcus* and *Enterococcus*, making it very attractive in diverse antimicrobial applications  
179 from food to medicine. Unfortunately, as also for many other bacteriocins, GarKS is produced at  
180 relatively low levels during normal laboratory growth conditions (31). The low production by the  
181 native producer can dramatically hamper potential applications of GarKS as industrial use of  
182 bacteriocins requires high and cost-effective production. We have shown that optimization of  
183 bacteriocin production by a bacterial strain is multi-factorial process, which involves the  
184 systematic evaluation of nutritional ingredients and growth conditions e.g., temperature, pH and  
185 aeration. The type of growth medium is probably one of the key factors in bacteriocins production  
186 (33). The complex media e.g., GM17, MRS, BHI, and TH have been used in cultivation of LAB  
187 because they give relatively good cell growth in laboratory conditions but not necessary for  
188 bacteriocin production (34). This is illustrated in our study, GarKS production was the best in MRS  
189 (320 BU/ml) but the lowest in BHI and TH (both 20 BU/ml) while the cell growth appeared about  
190 in the same range in these media ( $1-2 \times 10^9$  CFU/ml).

191 To choose the optimal medium for bacteriocin production is often an empirical matter. The  
192 components from complex media influencing bacteriocin production are often elusive and the  
193 outcomes might vary significantly dependent on the type of producers. Nevertheless, some media  
194 components have been shown to enhance bacteriocin production by inducing stress conditions due  
195 to nutrient limitation (35) or stabilizing the bacteriocin molecules (36). The use of commercial  
196 complex media (e.g., MRS) is not a cost-effective approach for large-scale bacteriocin production.  
197 For instance, culture medium could account for up to 30% of the total production cost in  
198 commercial biomolecule production (37). Accordingly, high costs of complex media will reduce

199 attractiveness of bacteriocins for commercial application. Our bacteriocin producer is a strain of  
200 *L. garvieae* isolated from raw milk and it has the capacity to ferment milk-associated sugars such  
201 as lactose and galactose while another strain of *L. garvieae* isolated from intestine of Mallard duck  
202 can not (31). Milk is a low-cost product relative to complex media and could be an ideal medium  
203 for GarKS producer. However, the native producer appeared to grow poorly in sole skim milk that  
204 might be the reason for reduced GarKS production. Skim milk is enriched in lactose and galactose  
205 as carbon source but does not contain easily accessed nitrogen-containing components for bacteria.  
206 Thus, the combination of tryptone and pasteurized skim milk which was found best for cell growth  
207 was in line with the notion that tryptone serves as an enriched source of nitrogen. Further, this  
208 formula also increased bacteriocin production over 30 fold compared to the growth in GM17.  
209 Tryptone is composed of short peptides that are derived from enzymatic digest of milk protein  
210 casein and serves as an enriched source of nitrogen in bacterial growth media.  
211 Increase of gene dose is another means to enhance the production of biomolecules (38). In the  
212 present study, we observed a 4-fold increase in bacteriocin production when a plasmid carrying  
213 the entire *gak* locus was introduced into the native producer. Interestingly, when we attempted to  
214 increase gene dose by introducing the structural genes only (using the plasmid pABC), no  
215 transformed cells were obtained. One possible explanation for this negative outcome is that  
216 expression of genetic determinants involved in bacteriocin biosynthesis is often highly fine-tuned  
217 to secure immunity and efficient export. The extra gene dose of the structural genes alone might  
218 override either immunity and/or transporter proteins, leading to toxicity in cell and cell death. It is  
219 worth mentioning that most bacteriocins are expressed with a leader sequence which is necessary  
220 not only for export but also to keep the bacteriocins in inactive form before export. For leaderless  
221 bacteriocins like in the case of GarKS, they are produced in mature active forms before export,

222 therefore an intracellular dedicated protection mechanism (immunity) available is crucial for cell  
223 survival.

224 We and others have observed that bacteriocin production by a certain strain is unstable, and  
225 dependent on the culture conditions applied (39, 40). Consequently, different growth parameters  
226 were examined to optimize the production of GarKS. LABs are well known for reducing culture  
227 pH due to lactic acid production (41) and this is also true for the GarKS producer. We found that  
228 culture conditions with constant pH 6 favors the cell growth and a high level of GarKS production.  
229 Similarly, optimal nisin production has been reported at constant pH 6.5 (42). The availability of  
230 oxygen also has a great influence on microbial cell growth and metabolic activities (43).  
231 Microorganisms vary with respect to their requirements and tolerance toward molecular oxygen.  
232 *L. garvieae* is a facultative anaerobic microorganism and its metabolic activities have been  
233 reported to differ between aerobic and anaerobic conditions (44). We observed that the controlled  
234 aeration had a positive effect on the cell growth and bacteriocin production. Similar results have  
235 also been observed for other bacteriocins. For example, nisin A production by *L. lactis* UL719 was  
236 enhanced with aeration (45). On the other hand, aeration has also been reported to be antagonistic to the  
237 production of lactosin S (46) and LIQ-4 bacteriocin (47), suggesting that the effect of aeration on  
238 bacteriocin production is strain-dependent.

239 In terms of cost-effectiveness, the medium PM-T contained tryptone which is a relatively costly  
240 component; therefore we are searching for alternatives to replace tryptone. In preliminary studies,  
241 we tested the chicken hydrolysate (processed from a waste product from meat industry) as an  
242 alternative low-cost protein source to produce GarKS. We found that the recombinant producer  
243 grew well in a medium based on Pasteurized milk and chicken hydrolysate (PM-CH), yielding a  
244 cell density of  $3 \times 10^9$  CFU/ml. However, although GarKS production in PM-CH was 8 times better

245 than in the complex media GM17, the production was 8 times less than in PM-T. Thus, further  
246 studies are necessary to optimize a PM-CH-based medium in order to achieve high level and cost-  
247 effective bacteriocin production.

248 Low bacteriocin production is often a bottle-neck in large-scaled production of bacteriocins for  
249 commercial use. Optimization of bacteriocin production is therefore an important research field to  
250 better exploit the antimicrobial potential of bacteriocins, especially with regard to the decreasing  
251 effects of antibiotics in infection treatments due to the global emergence of antibiotic resistance.  
252 In the present study we have shown that we managed to achieve a very high level of GarKS  
253 production, amounting to 164,000 BU/ml, by combining medium optimization, genetic  
254 engineering and culture condition optimization. This amount is about 2,000 times higher compared  
255 to the initial production in GM17 (80 BU/ml). A production of 164,000 BU/ml is equivalent to 1.2  
256 g GarKS per liter. To our knowledge, this is one of the highest bacteriocin production achieved so  
257 far. In comparison, nisin production has been reported to 0.40-0.80 g/L by *L. lactis* grown in a  
258 medium composed of equal volume of skim milk and complex media GM17 (5). Finally, our study  
259 and others' have shown that optimization of bacteriocin production is an empirical and multi-  
260 factorial process and that it is highly strain-dependent. Only by systematic evaluation of different  
261 aspects influencing growth and gene regulation one can find conditions suitable for high levels of  
262 production.

263

264

265

## 266 **Materials and Methods**

### 267 **Bacterial strains and growth conditions**

268 All bacterial strains and plasmids used in this study are listed in Table 2. Unless otherwise stated,  
269 the native bacteriocin producer *L. garvieae* KS1546 was grown in M17 broth supplemented with  
270 0.5% glucose (GM17) under static condition at 30°C. NEB® 10-beta *E. coli* (New England  
271 Biolabs, Beverly, MA, USA) was grown in Luria-Bertani (LB) broth with shaking (200 rpm) at  
272 37°C. Bacterial culture media and supplements were obtained from Oxoid Ltd (Hampshire, UK).  
273 When necessary, erythromycin (Sigma-Aldrich Inc., St. Louis, MO, USA) was added at  
274 200 µg/ml for *E. coli* and at 5 µg/ml for lactococcal species.

275

### 276 **Growth media for GarKS production**

277 The influence of different growth media on GarKS production was assessed in batch cultures under  
278 static condition at 30°C. Following commercial complex media were used: GM17, deMan, Rogosa  
279 and Sharpe (MRS), Todd-Hewitt (TH) and Brain Heart Infusion (BHI). To make new milk-based  
280 medium formulations, skim milk (5%, w/v) or pasteurized skim milk was combined with an equal  
281 volume of GM17, MRS, TH, and BHI, or with tryptone (10% w/v). Skim milk (SM) was prepared  
282 by using milk powder (Oxoid, UK) while pasteurized milk (PM) was obtained from a dairy  
283 company in Norway, Q-milk.

284

### 285 **DNA manipulation**

286 The *gak* cluster responsible for production of GarKS was amplified from genomic DNA of *L.*  
287 *garvieae* KS1546 using Phusion High-fidelity DNA polymerase (New England Biolabs, UK) and  
288 the primers *gakF* and *gakR1* (Table 2). The genes *gakABC* encoding the three peptides constituting

289 GarKS were amplified using the primers *gakF* and *gakR* (Table 2). Restriction sites *SacI* and  
290 *HindIII* were introduced at the 5' end of forward and reverse primers. NEBuilder HiFi DNA  
291 assembly cloning kit (New England Biolabs) was used to assemble the PCR fragments into the  
292 plasmid pMG36e (48). Plasmid DNA was amplified in *E. coli* NEB® 10-beta before being  
293 transferred into *L. garvieae* KS1546 or *L. lactis* IL1403 cells using a Gene Pulser™ (Bio-Rad  
294 Laboratories, Hercules, CA, USA). Primers used in this study were obtained from Life  
295 Technologies AS (ThermoFisher Scientific, Oslo, Norway). The integrity of all recombinant  
296 plasmids was confirmed by Sanger DNA sequencing (GATC Biotech AG; Constance, Germany),  
297 which were sequenced using primers *gakseqF*, *gakseqF1*, *gakseqF2*, *gakseqF3*, *gakseqR*, pMGF  
298 and pMGR (Table 2).

299

### 300 **Optimization of bacteriocin production in bioreactor conditions**

301 The effects of pH and aeration on GarKS production were tested at various constant pH (5, 6 and  
302 7), and at controlled aeration in a fully automated 2.5 L miniforce bioreactor (Infors AG,  
303 Switzerland). The pH was controlled by automatic addition of 5 M HCl or 5 M NaOH. The aeration  
304 was maintained by purging sterile air into culture medium. Temperature (30°C) and agitation speed  
305 of 150 rpm were maintained constant for all experiments. Samples of 2 ml were withdrawn  
306 aseptically every 2 h for determination of bacteriocin production and cell growth (see below).

307

### 308 **Determination of bacteriocin production and cell growth**

309 Bacteriocin activity was measured from heat-inactivated (100°C for 10 min) cell-free culture  
310 supernatants. Bacteriocin activity was quantified using a microtiter plate assay as previously  
311 described (27, 31). One bacteriocin unit (BU) was defined as the minimum amount of the  
312 bacteriocin that inhibited at least 50% of growth of the indicator (*L. lactis* IL103) in a 200 µl  
313 culture volume. Growth curve was determined by measuring turbidity of culture at OD<sub>600</sub> every  
314 30 min for 24 h or by counting colony forming units (CFU) from serially diluted bacterial cultures  
315 on agar plates. A standard curve based on the activity of 98% pure synthetic GarKS peptides  
316 (Pepmic Co., LTD, China) was used to define the specific bacteriocin activity (BU/mg) from cell  
317 free supernatant.

318

319

320

321



322 **ACKNOWLEDGEMENTS**

323 We thank Linda Godager and Line Degn Hansen for technical assistance. This study was financed  
324 by the Research Council of Norway, Project nr 254784.

325

326 **REFERENCES**

- 327 1. Bush K, Courvalin P, Dantas G, Davies J, Eisenstein B, Huovinen P, Jacoby GA, Kishony  
328 R, Kreiswirth BN, Kutter E, Lerner SA, Levy S, Lewis K, Lomovskaya O, Miller JH,  
329 Mobashery S, Piddock LJ, Projan S, Thomas CM, Tomasz A, Tulkens PM, Walsh TR,  
330 Watson JD, Witkowski J, Witte W, Wright G, Yeh P, Zgurskaya HI. 2011. Tackling  
331 antibiotic resistance. *Nat Rev Microbiol* 9:894-6.
- 332 2. Laxminarayan R, Matsoso P, Pant S, Brower C, Rottingen JA, Klugman K, Davies S. 2016.  
333 Access to effective antimicrobials: a worldwide challenge. *Lancet* 387:168-75.
- 334 3. Holmes P, Mauer J. 2016. Antimicrobial Resistance And New Antibiotics. *Health Aff*  
335 (Millwood) 35:1935.
- 336 4. Cotter PD, Hill C, Ross RP. 2005. Bacteriocins: developing innate immunity for food. *Nat*  
337 *Rev Microbiol* 3:777-88.
- 338 5. de Arauz LJ, Jozala AF, Mazzola PG, Penna TCV. 2009. Nisin biotechnological production  
339 and application: a review. *Trends in Food Science & Technology* 20:146-154.
- 340 6. Chikindas ML, Garcia-Garcera MJ, Driessen AJ, Ledebøer AM, Nissen-Meyer J, Nes IF,  
341 Abee T, Konings WN, Venema G. 1993. Pediocin PA-1, a bacteriocin from *Pediococcus*  
342 *acidilactici* PAC1.0, forms hydrophilic pores in the cytoplasmic membrane of target cells.  
343 *Appl Environ Microbiol* 59:3577-84.

- 344 7. Henning C, Vijayakumar P, Adhikari R, Jagannathan B, Gautam D, Muriana PM. 2015.  
345 Isolation and Taxonomic Identity of Bacteriocin-Producing Lactic Acid Bacteria from  
346 Retail Foods and Animal Sources. *Microorganisms* 3:80-93.
- 347 8. Grosu-Tudor SS, Stancu MM, Pelinescu D, Zamfir M. 2014. Characterization of some  
348 bacteriocins produced by lactic acid bacteria isolated from fermented foods. *World Journal*  
349 *of Microbiology & Biotechnology* 30:2459-2469.
- 350 9. Millette M, Dupont C, Shareck F, Ruiz MT, Archambault D, Lacroix M. 2008. Purification  
351 and identification of the pediocin produced by *Pediococcus acidilactici* MM33, a new  
352 human intestinal strain. *J Appl Microbiol* 104:269-75.
- 353 10. O'Shea EF, Gardiner GE, O'Connor PM, Mills S, Ross RP, Hill C. 2009. Characterization  
354 of enterocin- and salivaricin-producing lactic acid bacteria from the mammalian  
355 gastrointestinal tract. *FEMS Microbiol Lett* 291:24-34.
- 356 11. Hasper HE, Kramer NE, Smith JL, Hillman JD, Zachariah C, Kuipers OP, de Kruijff B,  
357 Breukink E. 2006. An alternative bactericidal mechanism of action for lantibiotic peptides  
358 that target lipid II. *Science* 313:1636-1637.
- 359 12. Diep DB, Skaugen M, Salehian Z, Holo H, Nes IF. 2007. Common mechanisms of target  
360 cell recognition and immunity for class II bacteriocins. *Proc Natl Acad Sci U S A*  
361 104:2384-9.
- 362 13. Nissen-Meyer J, Rogne P, Oppegard C, Haugen HS, Kristiansen PE. 2009. Structure-  
363 function relationships of the non-lanthionine-containing peptide (class II) bacteriocins  
364 produced by gram-positive bacteria. *Curr Pharm Biotechnol* 10:19-37.
- 365 14. Oscariz JC, Pisabarro AG. 2001. Classification and mode of action of membrane-active  
366 bacteriocins produced by gram-positive bacteria. *Int Microbiol* 4:13-9.

- 367 15. Tymoszevska A, Diep DB, Wirtek P, Aleksandrak-Piekarczyk T. 2017. The Non-  
368 Lantibiotic Bacteriocin Garvicin Q Targets Man-PTS in a Broad Spectrum of Sensitive  
369 Bacterial Genera. *Sci Rep* 7:8359.
- 370 16. Davis BD. 1987. Mechanism of bactericidal action of aminoglycosides. *Microbiol Rev*  
371 51:341-50.
- 372 17. Bush K, Jacoby GA. 2010. Updated functional classification of beta-lactamases.  
373 *Antimicrob Agents Chemother* 54:969-76.
- 374 18. Penna TCV, Moraes DA. 2002. Optimization of nisin production by *Lactococcus lactis*.  
375 *Applied Biochemistry and Biotechnology* 98:775-789.
- 376 19. Guerra NP, Pastrana L. 2002. Nisin and pediocin production on mussel-processing waste  
377 supplemented with glucose and five nitrogen sources. *Letters in Applied Microbiology*  
378 34:114-118.
- 379 20. Cabo ML, Murado MA, Gonzalez P, Pastoriza L. 2001. Effects of aeration and pH gradient  
380 on nisin production. A mathematical model. *Enzyme and Microbial Technology* 29:264-  
381 273.
- 382 21. Tafreshi SYH, Mirdamadi S, Norouzian D, Khatami S, Sardari S. 2010. Optimization of  
383 Non-Nutritional Factors for a Cost-Effective Enhancement of Nisin Production Using  
384 Orthogonal Array Method. *Probiotics and Antimicrobial Proteins* 2:267-273.
- 385 22. Biswas SR, Ray P, Johnson MC, Ray B. 1991. Influence of Growth-Conditions on the  
386 Production of a Bacteriocin, Pediocin Ach, by *Pediococcus-Acidilactici* H. *Applied and*  
387 *Environmental Microbiology* 57:1265-1267.

- 388 23. Nel HA, Bauer R, Vandamme EJ, Dicks LMT. 2001. Growth optimization of *Pediococcus*  
389 *damnosus* NCFB 1832 and the influence of pH and nutrients on the production of pediocin  
390 PD-1. *Journal of Applied Microbiology* 91:1131-1138.
- 391 24. Parente E, Ricciardi A. 1994. Influence of Ph on the Production of Enterocin-1146 during  
392 Batch Fermentation. *Letters in Applied Microbiology* 19:12-15.
- 393 25. Aasen IM, Moretro T, Katla T, Axelsson L, Storro I. 2000. Influence of complex nutrients,  
394 temperature and pH on bacteriocin production by *Lactobacillus sakei* CCUG 42687.  
395 *Applied Microbiology and Biotechnology* 53:159-166.
- 396 26. Mesa-Pereira B, O'Connor PM, Rea MC, Cotter PD, Hill C, Ross RP. 2017. Controlled  
397 functional expression of the bacteriocins pediocin PA-1 and bactofencin A in *Escherichia*  
398 *coli*. *Sci Rep* 7:3069.
- 399 27. Jimenez JJ, Diep DB, Borrero J, Gutiez L, Arbulu S, Nes IF, Herranz C, Cintas LM,  
400 Hernandez PE. 2015. Cloning strategies for heterologous expression of the bacteriocin  
401 enterocin A by *Lactobacillus sakei* Lb790, *Lb. plantarum* NC8 and *Lb. casei* CECT475.  
402 *Microbial Cell Factories* 14.
- 403 28. Horn N, Fernandez A, Dodd HM, Gasson MJ, Rodriguez JM. 2004. Nisin-controlled  
404 production of pediocin PA-1 and colicin V in nisin- and non-nisin-producing *Lactococcus*  
405 *lactis* strains. *Appl Environ Microbiol* 70:5030-2.
- 406 29. Jiang H, Li P, Gu Q. 2016. Heterologous expression and purification of plantaricin NC8, a  
407 two-peptide bacteriocin against *Salmonella* spp. from *Lactobacillus plantarum* ZJ316.  
408 *Protein Expr Purif* 127:28-34.
- 409 30. Kong W, Lu T. 2014. Cloning and optimization of a nisin biosynthesis pathway for  
410 bacteriocin harvest. *ACS Synth Biol* 3:439-45.

- 411 31. Ovchinnikov KV, Chi H, Mehmeti I, Holo H, Nes IF, Diep DB. 2016. Novel Group of  
412 Leaderless Multipeptide Bacteriocins from Gram-Positive Bacteria. *Applied and*  
413 *Environmental Microbiology* 82:5216-5224.
- 414 32. Oh S, Rheem S, Sim J, Kim S, Baek Y. 1995. Optimizing Conditions for the Growth of  
415 *Lactobacillus-Casei* Yit-9018 in Tryptone-Yeast Extract-Glucose Medium by Using  
416 Response-Surface Methodology. *Applied and Environmental Microbiology* 61:3809-3814.
- 417 33. Guerra NP, Agrasar AT, Macias CL, Pastrana L. 2005. Modelling the fed-batch production  
418 of pediocin using mussel processing wastes. *Process Biochemistry* 40:1071-1083.
- 419 34. Mataragas M, Drosinos EH, Tsakalidou E, Metaxopoulos J. 2004. Influence of nutrients  
420 on growth and bacteriocin production by *Leuconostoc mesenteroides* L124 and  
421 *Lactobacillus curvatus* L442. *Antonie Van Leeuwenhoek International Journal of General*  
422 *and Molecular Microbiology* 85:191-198.
- 423 35. Verluyten J, Leroy F, de Vuyst L. 2004. Influence of complex nutrient source on growth  
424 of and curvacin A production by sausage isolate *Lactobacillus curvatus* LTH 1174. *Applied*  
425 *and Environmental Microbiology* 70:5081-5088.
- 426 36. Herranz C, Martinez JM, Rodriguez JM, Hernandez PE, Cintas LM. 2001. Optimization of  
427 enterocin P production by batch fermentation of *Enterococcus faecium* P13 at constant pH.  
428 *Applied Microbiology and Biotechnology* 56:378-383.
- 429 37. Rivas B, Moldes AB, Dominguez JM, Parajo JC. 2004. Development of culture media  
430 containing spent yeast cells of *Debaryomyces hansenii* and corn steep liquor for lactic acid  
431 production with *Lactobacillus rhamnosus*. *International Journal of Food Microbiology*  
432 97:93-98.

- 433 38. Nijland JG, Ebbendorf B, Woszczyńska M, Boer R, Bovenberg RAL, Driessen AJM. 2010.  
434 Nonlinear Biosynthetic Gene Cluster Dose Effect on Penicillin Production by *Penicillium*  
435 *chrysogenum*. *Applied and Environmental Microbiology* 76:7109-7115.
- 436 39. Criado R, Gutierrez J, Martin M, Herranz C, Hernandez PE, Cintas LM. 2006.  
437 Immunochemical characterization of temperature-regulated production of enterocin L50  
438 (EntL50A and EntL50B), enterocin P, and enterocin Q by *Enterococcus faecium* L50. *Appl*  
439 *Environ Microbiol* 72:7634-43.
- 440 40. Diep DB, Axelsson L, Grefslı C, Nes IF. 2000. The synthesis of the bacteriocin sakacin A  
441 is a temperature-sensitive process regulated by a pheromone peptide through a three-  
442 component regulatory system. *Microbiology-Uk* 146:2155-2160.
- 443 41. Bartkiene E, Krungleviciute V, Juodeikiene G, Vidmantiene D, Maknickiene Z. 2015.  
444 Solid state fermentation with lactic acid bacteria to improve the nutritional quality of lupin  
445 and soya bean. *Journal of the Science of Food and Agriculture* 95:1336-1342.
- 446 42. Gonzalez-Toledo SY, Dominguez-Dominguez J, Garcia-Almendarez BE, Prado-Barragan  
447 LA, Regalado-Gonzalez C. 2010. Optimization of Nisin Production by *Lactococcus lactis*  
448 UQ2 Using Supplemented Whey as Alternative Culture Medium. *Journal of Food Science*  
449 75:M347-M353.
- 450 43. Garcia-Ochoa F, Gomez E. 2009. Bioreactor scale-up and oxygen transfer rate in microbial  
451 processes: an overview. *Biotechnol Adv* 27:153-76.
- 452 44. Delpech P, Rifa E, Ball G, Nidelet S, Dubois E, Gagne G, Montel MC, Delbes C, Bornes  
453 S. 2017. New Insights into the Anti-pathogenic Potential of *Lactococcus garvieae* against  
454 *Staphylococcus aureus* Based on RNA Sequencing Profiling. *Frontiers in Microbiology* 8.

- 455 45. Amiali MN, Lacroix C, Simard RE. 1998. High nisin Z production by *Lactococcus lactis*  
456 UL719 in whey permeate with aeration. *World Journal of Microbiology & Biotechnology*  
457 14:887-894.
- 458 46. Mortvedtabildgaard CI, Nissenmeyer J, Jelle B, Grenov B, Skaugen M, Nes IF. 1995.  
459 Production and Ph-Dependent Bactericidal Activity of Lactocin-S, a Lantibiotic from  
460 *Lactobacillus-Sake-L45*. *Applied and Environmental Microbiology* 61:175-179.
- 461 47. Kuhnen E, Sahl HG, Brandis H. 1985. Purification and Properties of Liq 4, an Antibacterial  
462 Substance Produced by *Streptococcus-Faecalis* Var *Liquefaciens-K4*. *Journal of General*  
463 *Microbiology* 131:1925-1932.
- 464 48. van de Guchte M, van der Vossen JM, Kok J, Venema G. 1989. Construction of a  
465 lactococcal expression vector: expression of hen egg white lysozyme in *Lactococcus lactis*  
466 subsp. *lactis*. *Appl Environ Microbiol* 55:224-8.
- 467
- 468

469 **Figure legends**

470

471 **Figure 1.** GarKS production by the native producer in different complex growth media (A), and  
472 in skim milk (SM) combined with complex growth media (B). Each culture was started by adding  
473 1% (v/v) culture inoculum to a 5 ml growth medium and then incubated at 30°C without shaking.  
474 Bacteriocin activity was measured at different time points. Standard deviations were based on  
475 triplicate assays.

476 **Figure 2.** Bacteriocin production in a medium composed of skim milk and tryptone. Different  
477 ratios of skim milk and tryptone were made in the formulation by mixing an increasing portion  
478 of skim milk (10%; w/v; from 1 volume to 9 volumes) with a corresponding decreasing portion  
479 of tryptone (10%, w/v; 9 volumes to 1 volume). For growth conditions, see legend in figure 1.  
480 The bacteriocin activity was measured after 9 h of culture incubation. Standard deviations were  
481 based on triplicate assays.

482 **Figure 3.** The plasmid map of pABC (A) and pA2T (B), which were used to increase the gene  
483 dose of the structural genes (*gakABC*) and the *gak* cluster in the native producer, respectively.

484 **Figure 4.** Temporal growth profile of the recombinant producer (KS1546-pA2T), and the native  
485 producer with empty plasmid (KS1546-pMG) or without plasmid (*L. garvieae* KS1546). Data  
486 were acquired from triplicate assays. Standard deviations are within a range  $\pm 0.01$  to  $\pm 0.05$ .

487 **Figure 5.** GarKS production of the recombinant producer (KS1546-pA2T) in cultivation at  
488 constant pH (pH at 5, 6, or 7) or at constant pH 6 and aeration (50-60 % dissolved oxygen). Each  
489 culture was started by adding 2% (v/v) culture inoculum in 1.5 l of PM-T medium containing



490 erythromycin at final concentration of 5  $\mu$ g/ml. Standard deviations were based on triplicate  
491 assays.

492

### 493 **Table legends**

494 **Table 1.** Influence of growth media, increased gene dose and culture conditions on bacteriocin  
495 production.

496

497 **Table 2.** Bacterial strains, plasmids and primers used in this study

498

499 **Tables:**

500 **Table 1.** Influence of growth media, increased gene dose and culture conditions on bacteriocin  
501 production.

| Strain                                            | Growth medium                                                 | Bacteriocin activity (BU/ml)           | Cell growth (CFUs/ml)  |
|---------------------------------------------------|---------------------------------------------------------------|----------------------------------------|------------------------|
| Native producer<br><i>L. garvieae</i> KS1546      | GM17 <sup>a</sup>                                             | 80 ±20                                 | 3×10 <sup>9</sup>      |
|                                                   | MRS <sup>a</sup>                                              | 320 ±20                                | 1×10 <sup>9</sup>      |
|                                                   | BHI <sup>a</sup>                                              | 20                                     | 1.5 ×10 <sup>9</sup>   |
|                                                   | TH <sup>a</sup>                                               | 20                                     | 2 ×10 <sup>9</sup>     |
|                                                   | SM <sup>b</sup> (10%, w/v)                                    | 160 ±20                                | 2 ×10 <sup>8</sup>     |
|                                                   | Tryptone <sup>a</sup> (10%, w/v)                              | 80 ±20                                 | 3 ×10 <sup>8</sup>     |
|                                                   | SM-TH <sup>b</sup>                                            | 2600 ±80                               | 2.9 ×10 <sup>9</sup>   |
|                                                   | SM-GM17 <sup>b</sup>                                          | 1280                                   | 3 ×10 <sup>9</sup>     |
|                                                   | SM-MRS <sup>b</sup>                                           | 320                                    | 2.8 ×10 <sup>9</sup>   |
|                                                   | SM-BHI <sup>b</sup>                                           | 160                                    | 2.9×10 <sup>9</sup>    |
|                                                   | SM-T <sup>b</sup>                                             | 2600 ±80                               | 3 ×10 <sup>9</sup>     |
|                                                   | SM-T-YE <sup>b</sup>                                          | 1300 ±40                               | 3 ×10 <sup>9</sup>     |
|                                                   | PM-T <sup>b</sup>                                             | 5100 ±80                               | 3.5 ×10 <sup>9</sup>   |
|                                                   | The recombinant<br>producer <i>L. garvieae</i><br>KS1546-pA2T | PM-T <sup>b</sup> (uncontrolled<br>pH) | 20,000 ±400            |
| PM-T <sup>b</sup> (constant pH 5)                 |                                                               | 2600 ±80                               | 3.2 ×10 <sup>9</sup>   |
| PM-T <sup>b</sup> (constant pH 6)                 |                                                               | 82,000 ±400                            | 0.7 ×10 <sup>10</sup>  |
| PM-T <sup>b</sup> (constant pH 7)                 |                                                               | 41,000 ±400                            | 0.65 ×10 <sup>10</sup> |
| PM-T <sup>b</sup> (constant pH 6<br>and aeration) |                                                               | 164,000 ±400                           | 1×10 <sup>10</sup>     |

502 The bacteriocin activity and cell growth from complex growth media (a) and milk based media (b)  
503 were measured after 7 and 9 h of incubation, respectively. SM- Skim milk, T- Tryptone, YE- Yeast  
504 extract, and PM-Pasteurized milk. Standard deviations (±) were based on triplicate assays.

505

506

507

508

509 **Table 2.** Bacterial strains, plasmids and primers used in this study

| Strain, plasmid or primer            | Description                                                            | Source/ reference  |
|--------------------------------------|------------------------------------------------------------------------|--------------------|
| <i>Strains</i>                       |                                                                        |                    |
| <i>L. garvieae</i> KS1546            | Wild type strain, native GarKS bacteriocin producer                    | [31]               |
| <i>L. garvieae</i> KS1546-pA2T       | <i>L. garvieae</i> KS1546 containing the recombinant plasmid pA2T      | This study         |
| <i>L. lactis</i> IL 1403-pA2T        | <i>L. lactis</i> 1403 containing the recombinant plasmid pA2T          | This study         |
| <i>L. garvieae</i> KS1546-pMG        | <i>L. garvieae</i> KS1546 containing the empty plasmid pMG36e          | This study         |
| <i>L. lactis</i> IL 1403-pMG         | <i>L. lactis</i> IL 1403 containing the empty plasmid pMG36e           | This study         |
| <i>Escherichia coli</i> NEB® 10-beta | Subcloning host strain                                                 | New England Biolab |
| <i>Plasmids</i>                      |                                                                        |                    |
| pMG36e                               | Em <sup>R</sup> , <i>E. coli</i> - <i>Lactococcus</i> shuttle vector   | [48]               |
| pABC                                 | pMG36e containing the structural genes <i>gakABC</i> , Em <sup>R</sup> | This study         |
| pA2T                                 | pMG36e containing the entire <i>gak</i> cluster; Em <sup>R</sup>       | This study         |
| <i>Primers</i>                       |                                                                        |                    |
| <i>gakF</i>                          | 5'-CGTAATTCGAGCTCCACCTC TGCTGTTTTTC-3'                                 | This study         |
| <i>gakR</i>                          | 5'-AGACTTTGCAAGCTTGCAAT ATTACGTTTGTGGG-3'                              | This study         |
| <i>gakR1</i>                         | 5'-AGACTTTGCAAGCTTTTAATCC TGACTCATCAGATATTC-3'                         | This study         |
| <i>gakSeqF</i>                       | 5'-GTACATAGTACCTCAAATTAT TTGAGC-3'                                     | This study         |
| <i>gakseqF1</i>                      | 5'-GCAGAGCTTTAGTGTGGGAT-3'                                             | This study         |
| <i>gakseqF2</i>                      | 5'-CGCTATTGCTTCTGAATATATA GTGGAC-3'                                    | This study         |
| <i>gakseqF3</i>                      | 5'-GGCACTTTTACAAGAAATAGG ACT-3'                                        | This study         |
| <i>gakseqR</i>                       | 5'-AGTAATTGCTTTATCAACTGCT GC-3'                                        | This study         |
| pMGF                                 | 5'-CATCCTCTTCGTCTTGGTAGC-3'                                            | This study         |
| pMGR                                 | 5'-GGCAGCTGATCTCAACAATG-3'                                             | This study         |

510

511

512

513 **Figures**

514

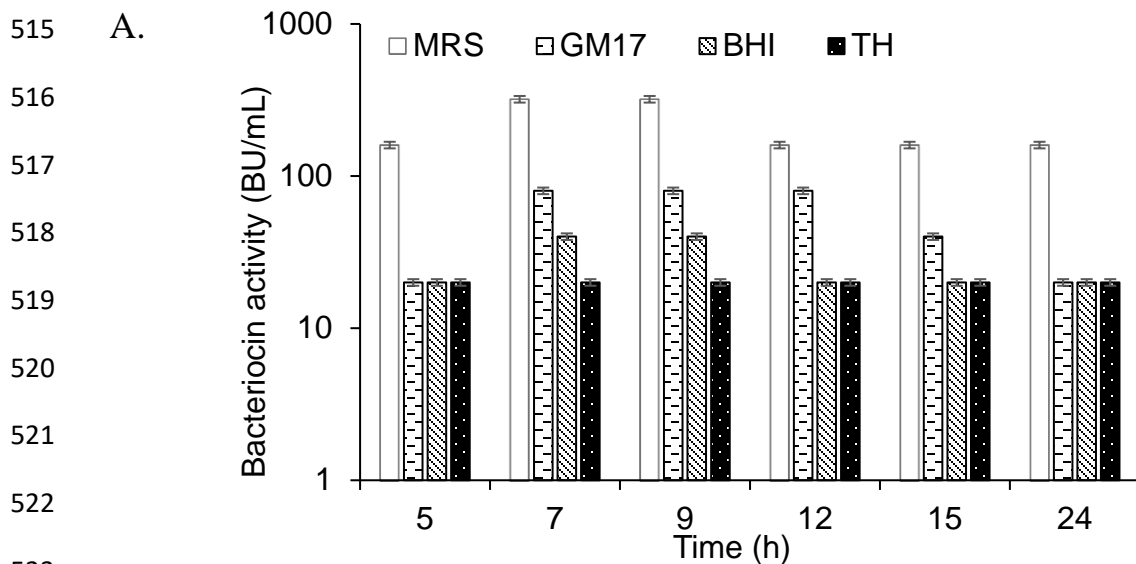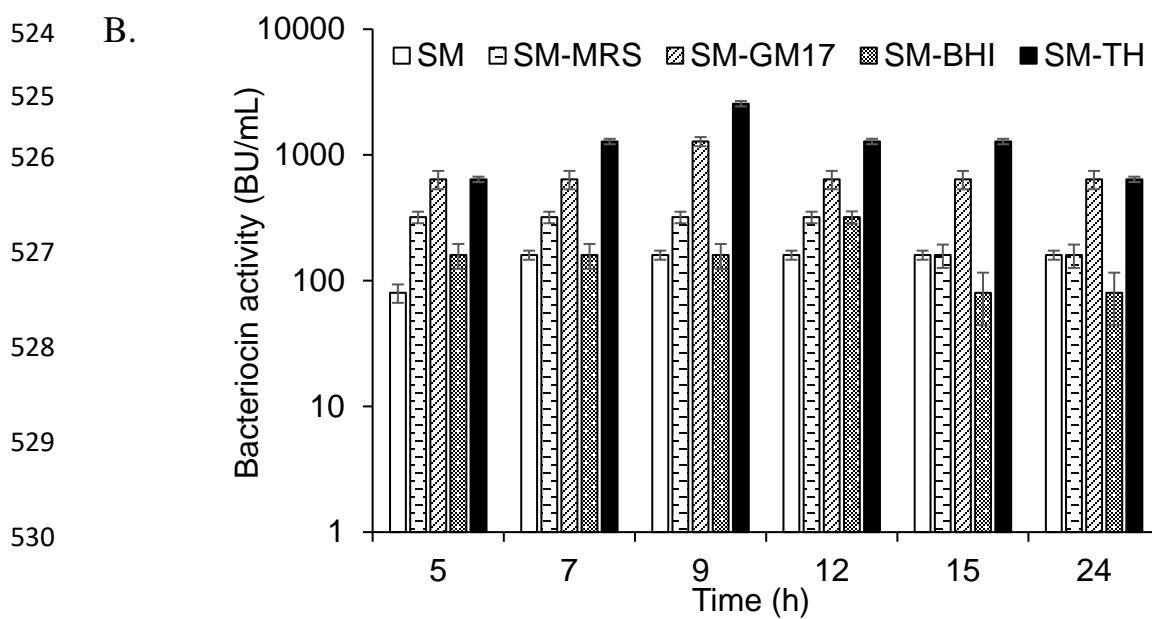

533 Figure. 1

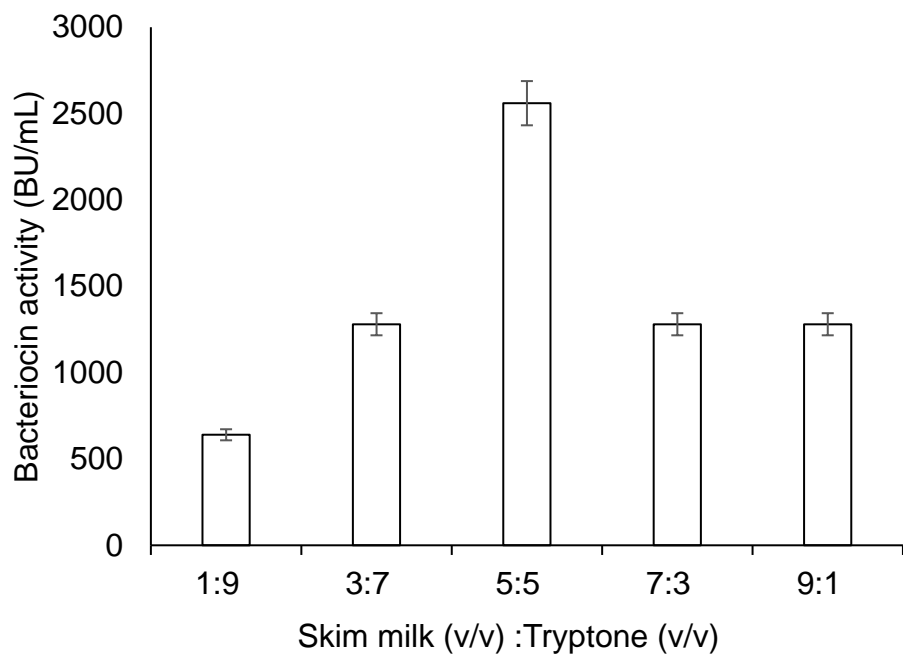

534

535

536 Figure. 2.

537

538

539

540

541

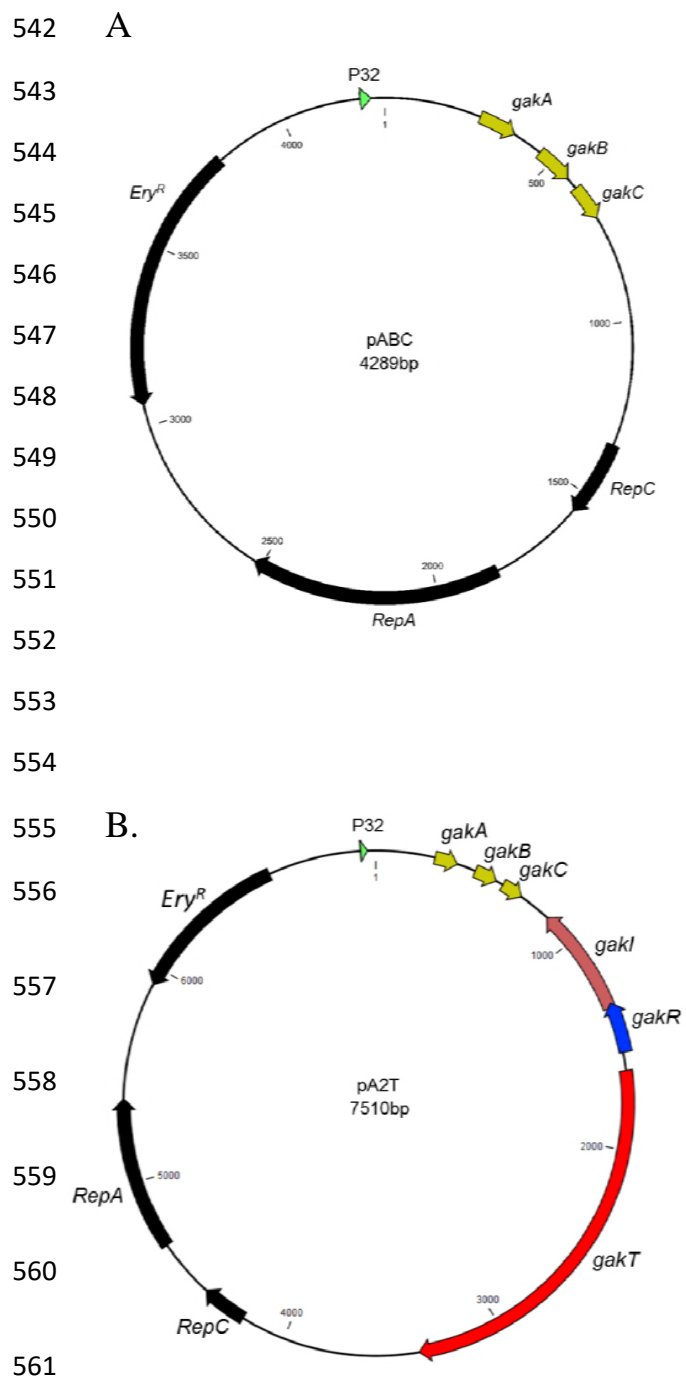

563 Figure 3.

564

565

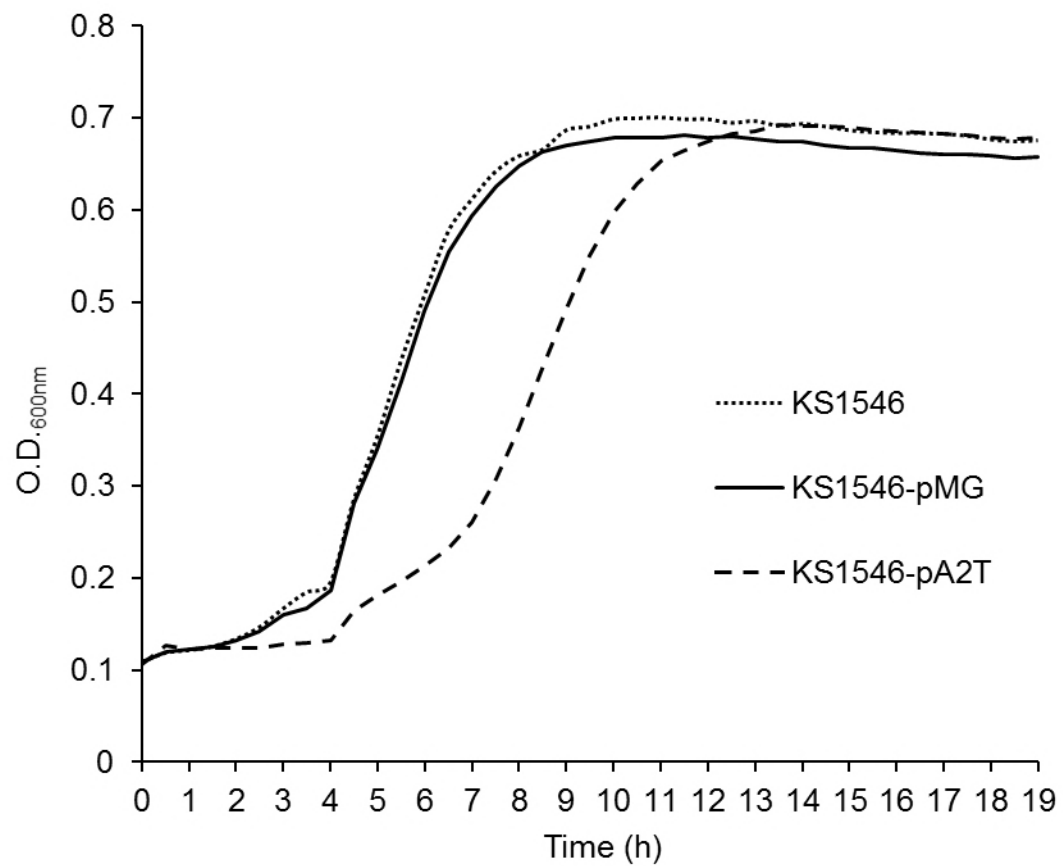

566

567 Figure 4.

568

569

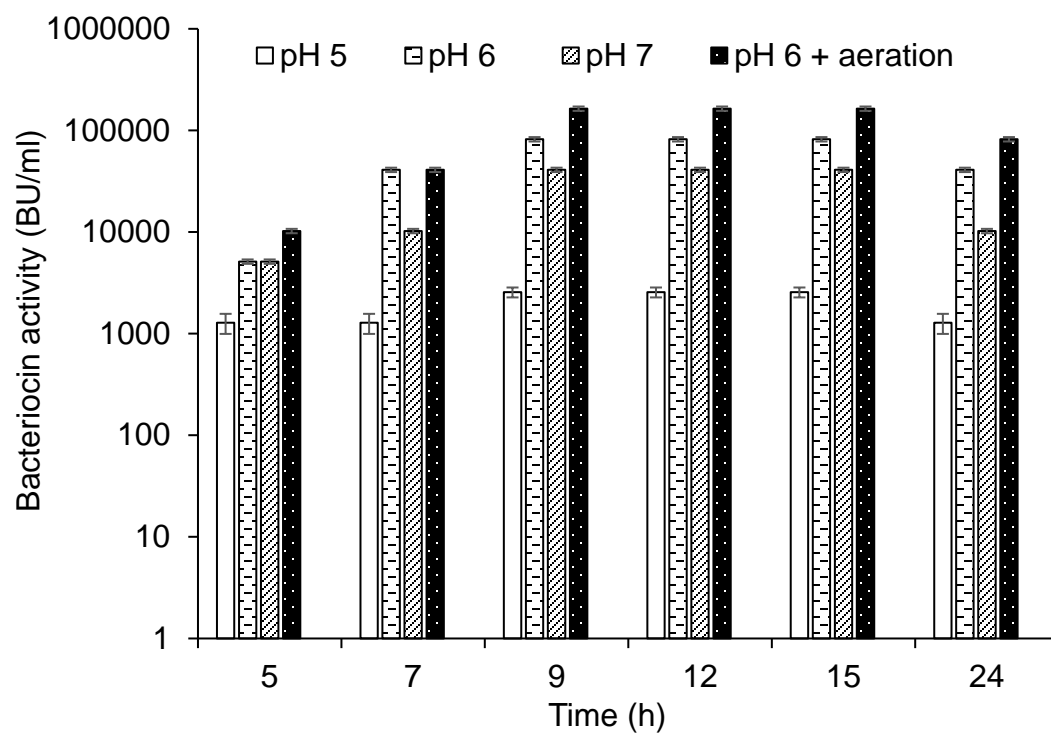

570

571

572 Figure 5.

573

574
